# Supplementary material for: Probiotics as a treatment for prenatal maternal anxiety and depression: a double-blind randomized pilot trial
Source: PubMed Central journal article supplement (PMC7862351; doi:10.1038/s41598-021-81204-9), 2021-02-04

**Probiotics as a treatment for prenatal maternal anxiety and depression: a double-blind randomized pilot trial**

Pamela D. Browne<sup>1,2\*</sup>, Antoinette C. Bolte<sup>3</sup>, Isolde Besseling-van der Vaart<sup>4</sup>, Eric Claassen<sup>2</sup>,  
Carolina de Weerth<sup>1</sup>

---

**Supplementary Figure 1** Self-created stressful events questionnaire.

Indicate whether each of the following events occurred in the past year (yes/no):

- 1) Serious illness (yourself)
  - 2) Serious illness (your partner)
  - 3) Death of a close family member or friend
  - 4) Divorce/break up with your partner
  - 5) Relational/marital problems
  - 1) Financial problems
  - 2) Domestic violence
  - 3) Other major or stressful events, namely ....
-

**Supplementary Figures 2A-E.** Participants' responses as a percentage of the total women reporting on their experiences with filling in online questionnaires (N=38), collecting stool samples (N=34) and vaginal samples (N=33), and having hair collected during the study period (N=34). Grey bars indicate positive experiences; dotted bars indicate negative experiences.

## A. How did you experience to fill in online questionnaires?

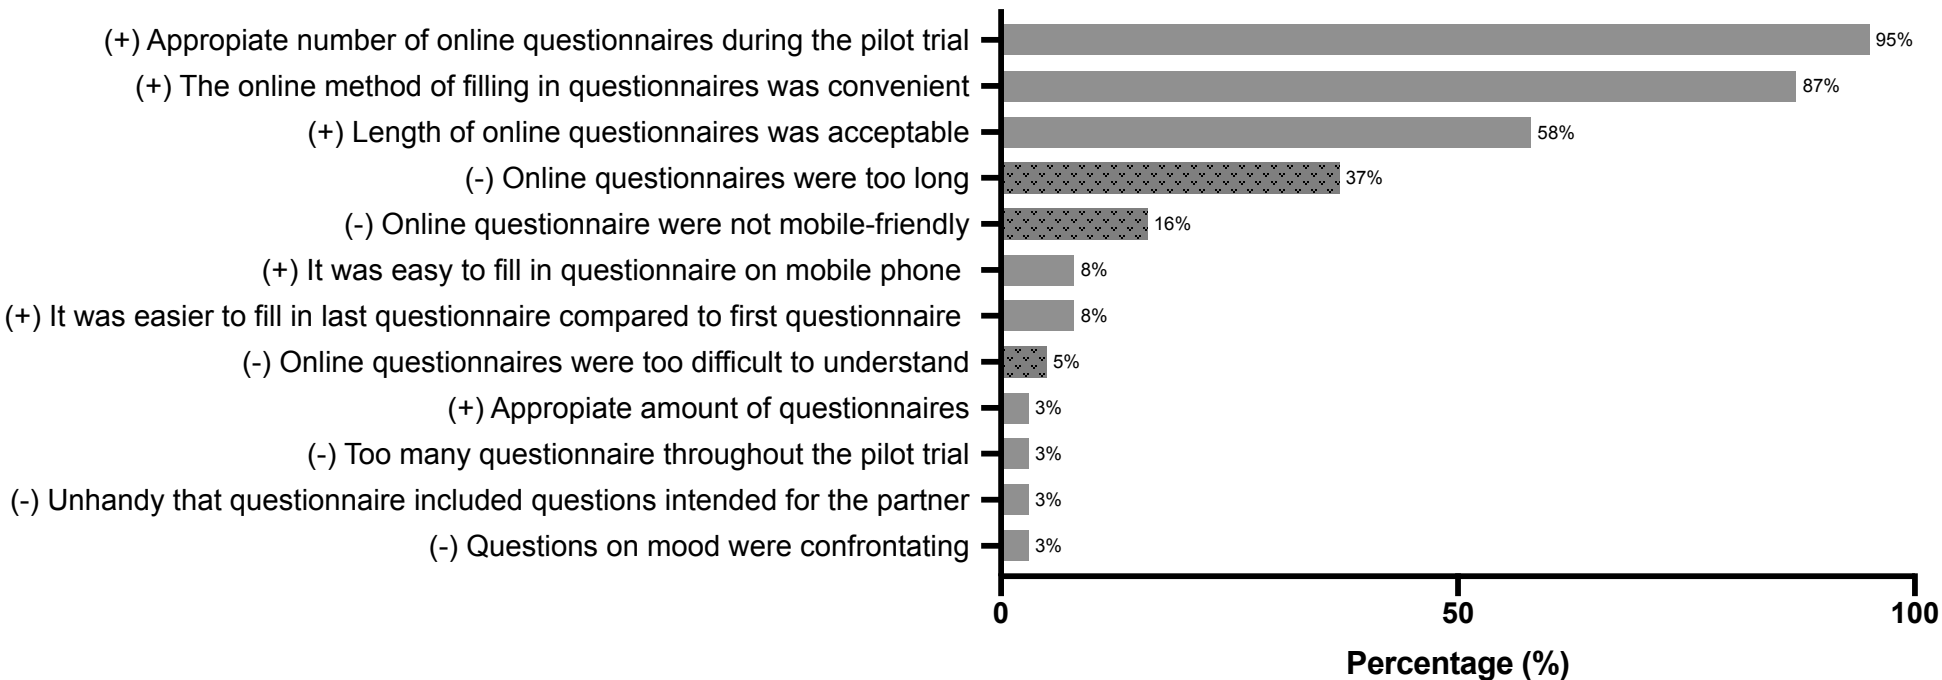

## B. How did you experience to collect own stool samples?

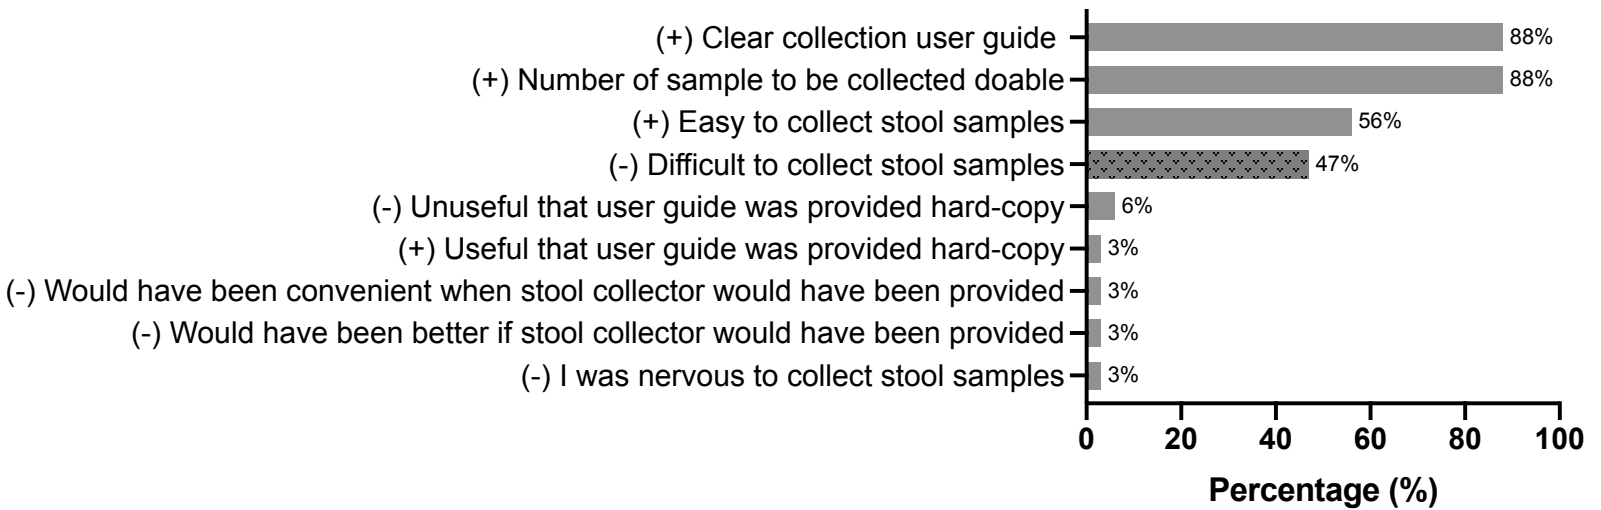

### C. How did you experience to collect infant stool samples?

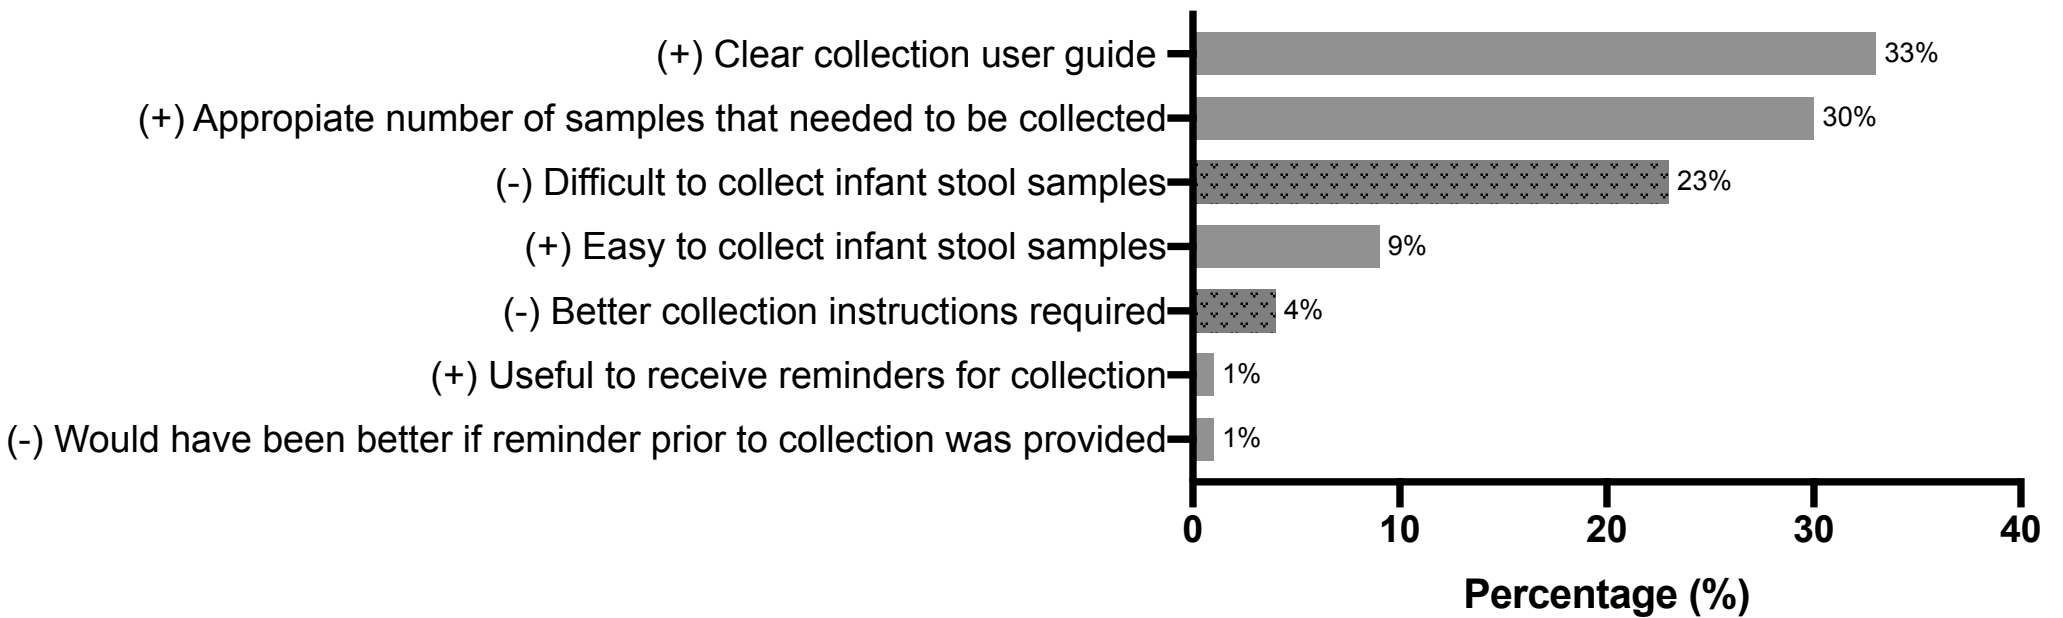

### D. How did you experience to collect vaginal samples?

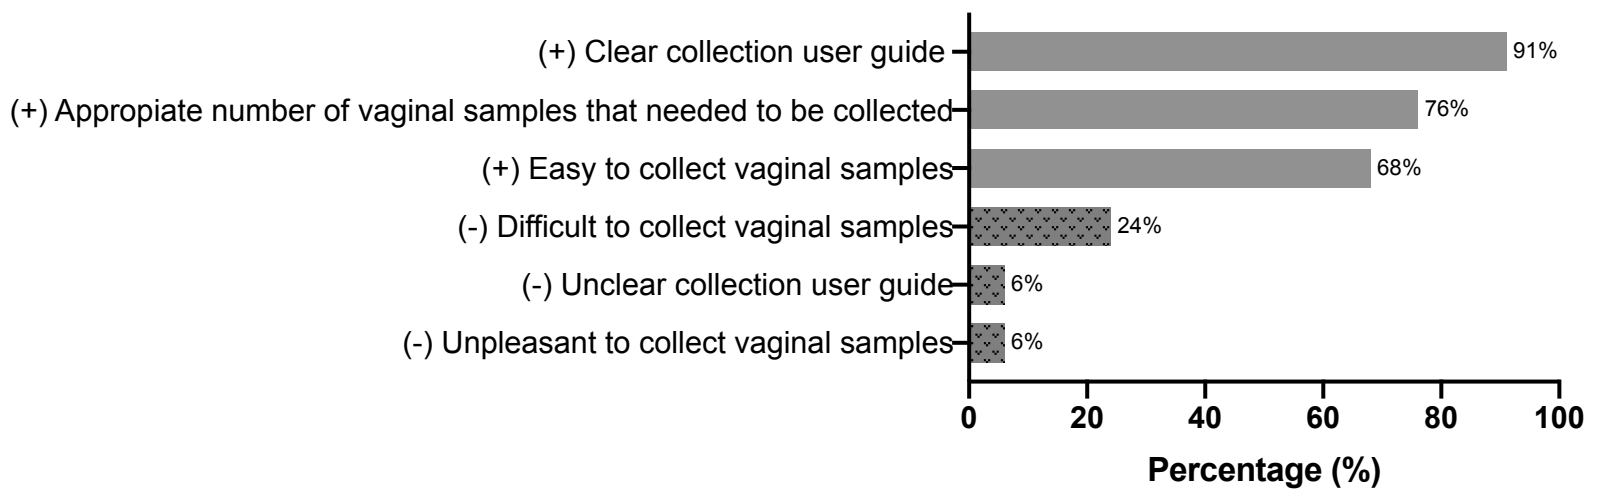

### E. How did you experience to have hair collected?

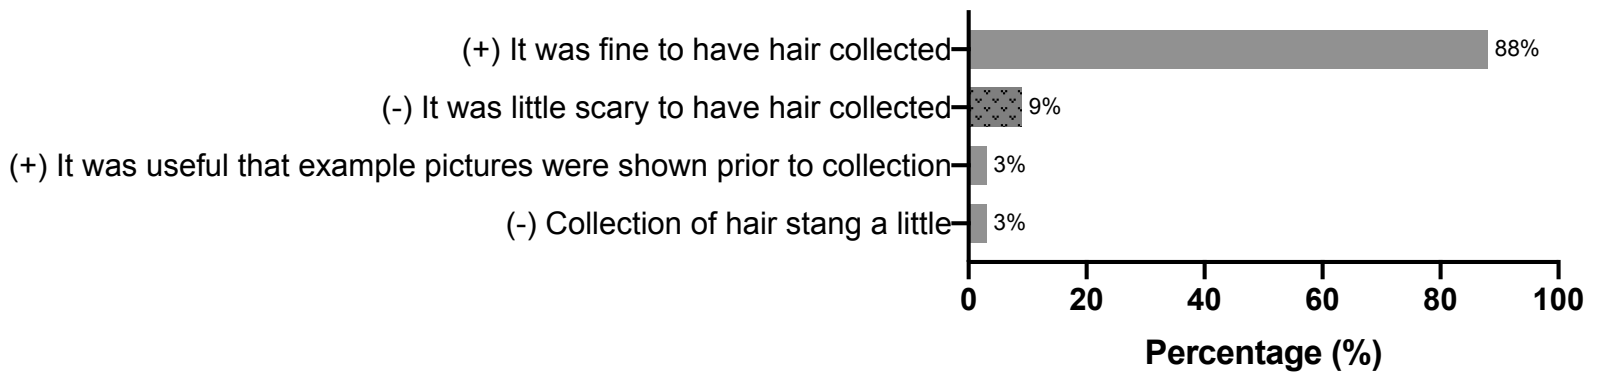

**Supplementary Figures 3A-B.** Participants' reported positive and negative aspects of the pilot trial as a percentage of the total women filling in the evaluation form (N=38).



## A. Most positive aspects of the pilot trial

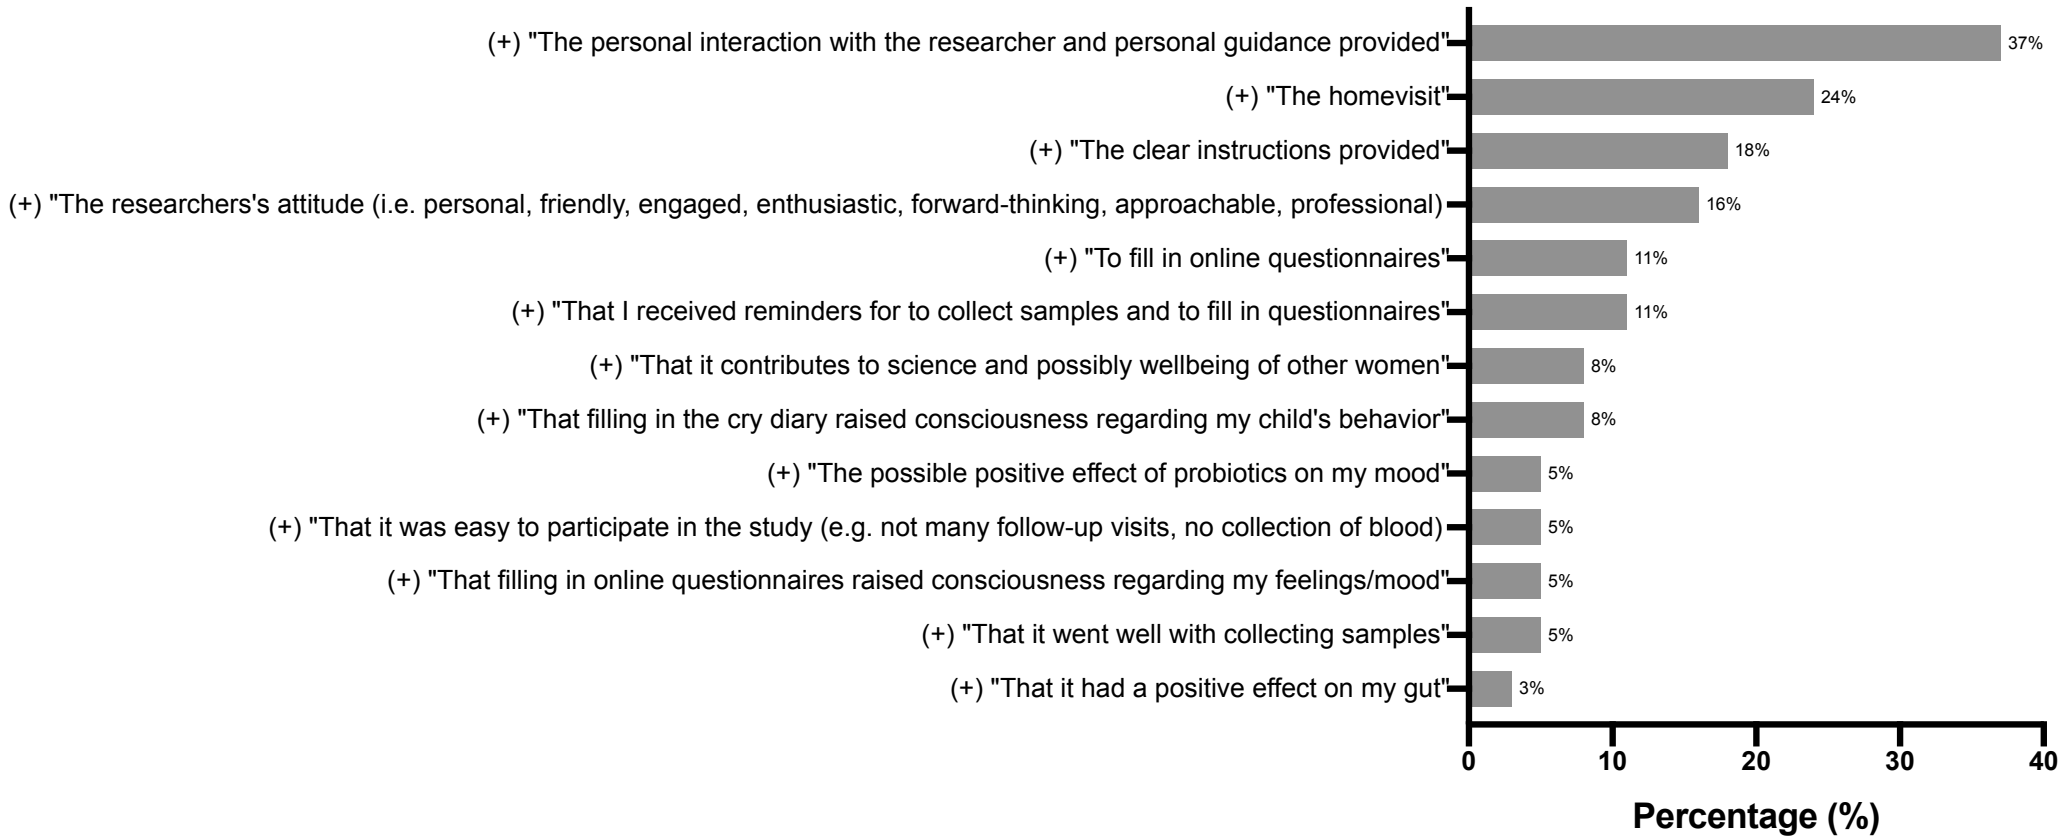

## B. Most negative aspects of the pilot trial

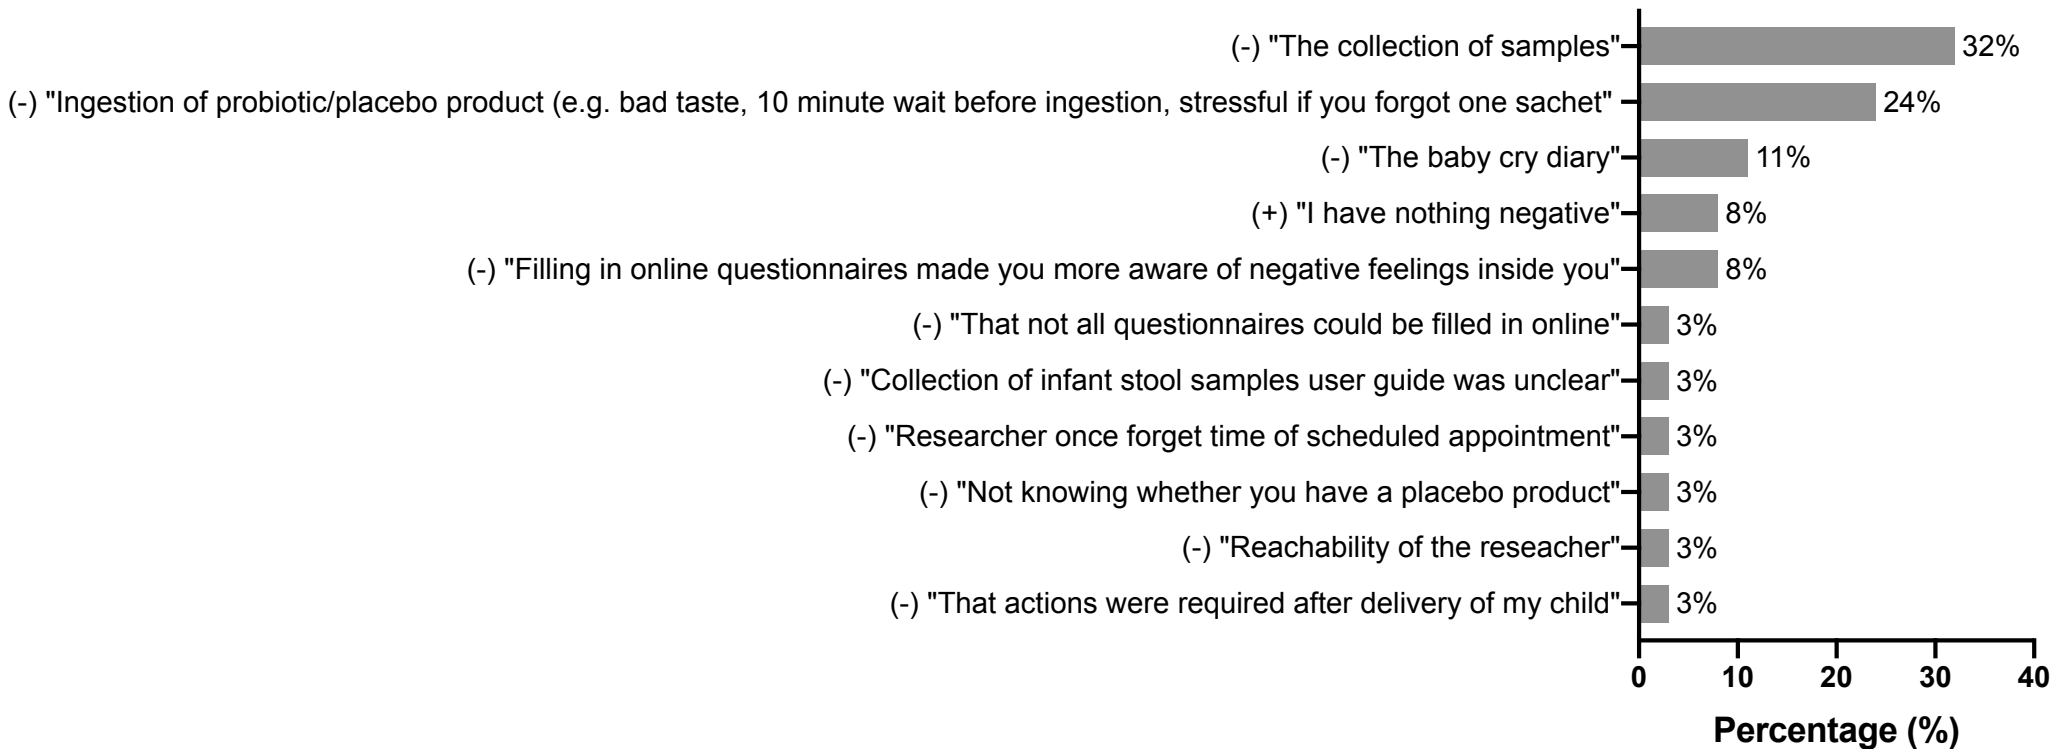

Supplement: 41598_2021_81204_MOESM1_ESM.pdf [file 41598_2021_81204_MOESM1_ESM.pdf]
